# Supplementary material for: Effect of predation risk and ectoparasitic louse flies on physiological stress condition of the red-tailed tropicbird (Phaethon rubricauda) from Rapa Nui and Salas & Gómez islands
Source: PeerJ. 2020 Jul 8;8:e9088. doi: 10.7717/peerj.9088 (PMC7353918; doi:10.7717/peerj.9088)
Supplement: Supplemental Information 2 [file peerj-08-9088-s002.xlsx]

## Sheet: Red-tailed tropicbird
ID	Species	Age	Island	Date	JulianDay	sex	Nest ID	Nest Category	Eggs	Chick in nest	Flies (n)	mRNA HSP70 relative level	Body Condition	H/L	Heterophils/10,000 erithrocytes	Eosinophils/10,000 erythrocytes	Lymphocytes/10,000 erythrocytes	Leukocytes/10,000 erythrocytes	Monocyte/ 10,000 erythrocytes	Baosphil/ 10,000 erythrocytes	Heterophils %	Eosinophils %	Basophils %	Lymphocytes %	Monocytes %	Skull Length mm	Bill Length mm	Wing Length mm	Tarsus Length mm	Weight (g)
Tav 1	Phaethon rubricauda	Adult	SGI	42605	2457624	female			1	0	10	0.50874	0.938972	1.91851	19.0479	16.5338	9.92845	50.077	0.730463	4.56691	37.5	35	8.5	19	1.5	136.5	63.35	325	35.95	750
Tav 2	Phaethon rubricauda	Adult	SGI	42605	2457624	female			1	0	4	0.396392	1.00088	3.42527	17.6914	4.65534	5.16497	30.6885	0.920654	3.17673	57.5	15	10.5	17	3	129	58.65	336	38.2	835
Tav 3	Phaethon rubricauda	Adult	SGI	42605	2457624	female			1	0	1	0.787308	0.986004	0.799964	20.5328	5.87634	25.6672	55.0535	1.85954	2.9771	37.5	11	5	46.5	3.5	129.1	59.75	333	35.1	795
Tav 4	Phaethon rubricauda	Adult	SGI	42605	2457624	male			1	0	23	0.530344	1.09943	2.04697	15.0624	8.69171	7.3584	31.1125	0.64205	0	48.5	27.5	0	24	2.5	129.6	63.3	341	34.9	900
Tav 5	Phaethon rubricauda	Adult	SGI	42605	2457624	male			1	0	6	0.685391	0.994494	0.863217	6.87722	7.55602	7.96697	22.6265	1.04204	0.226265	31	34	1	34	4	135.75	65.15	331	38.05	820
Tav 6	Phaethon rubricauda	Adult	SGI	42605	2457624	female			1	0	9	1.40932	1.19807	1.66629	14.3665	12.0949	8.62184	35.0833	0.350833	0	41	34.5	0	24.5	1	132	66.1	341	35.95	990
Tav 7	Phaethon rubricauda	Adult	SGI	42605	2457624	male			1	0	10	0.576343	1.10913	0.457641	0.784293	2.48982	1.71377	5.01038	0.0276131	0.0224907	15.5	50	0.5	34	0.5	133.15	65.35	332	39.1	925
Tav 8	Phaethon rubricauda	Adult	SGI	42605	2457624	male			1	0	7	1.00347	1.04833	1.57491	11.3091	11.2643	7.18081	30.3615	1.82169	0.607229	37.5	37	2	23.5	6	129.45	62.2	329	37.95	860
Tav 9	Phaethon rubricauda	Adult	SGI	42605	2457624	male			1	0	11	0.600818	1.06056	1.53558	5.0522	2.13065	3.2901	10.4729	0.895635	0	48.5	20.5	0	31	8.5	132.85	63.4	336	40.15	900
Tav 17	Phaethon rubricauda	Adult	RN	42611	2457630	female			1	0	0	0.45219	1.06712	0.304893	3.69694	6.4364	12.1254	22.5077	1.17811	0.249004	16	29.5	1	53.5	5.5	132.65	67.4	325	35.65	850
Tav 19	Phaethon rubricauda	Adult	RN	42611	2457630	female			1	0	0		0.878465	1.59887	6.20791	8.8554	3.88269	18.946	0.994046	0	34	46	0	20	5	133.45	68.6	339	38.6	740
Tav 21	Phaethon rubricauda	Adult	RN	42611	2457630	female			1	0	0		1.12177	0.801247	11.3263	27.0594	14.1358	52.5215	3.67651	0	21.5	51	0	27.5	7	131.5	62.95	336	33.25	895
Tav 20	Phaethon rubricauda	Adult	RN	42611	2457630	male			1	0	0	0.657471	0.965102	1.05765	3.32	1.85838	3.13904	8.35223	0.327155	0.0348047	39.5	22.5	0.5	37.5	4.5	134.7	67	340	38.65	815
Tav 25	Phaethon rubricauda	Adult	RN	42617	2457636	female			1	0	0	2.5403	1.15269	0.968119	5.23688	6.42667	5.40933	17.2453	0.563257	0.172453	30.5	37	1	31.5	3	135.8	71.3	342	36.6	960
Tav 29	Phaethon rubricauda	Adult	RN	42617	2457636	female			0	0	0	0.657471	0.99002	1.42975	17.5011	5.49585	12.2407	35.2376	2.60881	0	51.5	15.5	0	33	7.5	135.9	68.55	350	36.85	840
Tav 23	Phaethon rubricauda	Adult	RN	42617	2457636	male			1	0	0		0.984416	0.769231	5.67716	5.67716	7.38031	18.9239	0.567716	0.189239	30	30	1	39	3	136.2	70.8	354	37.95	850
Tav 24	Phaethon rubricauda	Adult	RN	42617	2457636	male			1	0	0	2.24233	0.983793	1.25291	11.8196	4.17431	9.43374	25.4277	0.517054	0	46.5	16.5	0	37	2	141.95	67	360	38	860
Tav 28	Phaethon rubricauda	Adult	RN	42617	2457636	male			1	0	0	0.666649	0.990719	2.46257	17.8173	5.12529	7.23526	30.1779	1.65793	0	59	17	0	24	5.5	132.7	64.5	352	36.3	840
TVK02	Phaethon rubricauda	Adult	SGI	42702	2457721	male			1	0	5		0.902968	1.28869	14.4343	9.57052	11.2007	35.2055	1.25125	0	41	27	0	32	3	136.45	71.2	346	33.1	735
TVK03	Phaethon rubricauda	Adult	SGI	42702	2457721	female			1	0	9	0.416099	0.942042	0.995307	6.94247	8.70264	6.97521	22.9017	0.811366	0.281368	31	38	1	30	4	130.25	68.85	333	33	745
TVK04	Phaethon rubricauda	Adult	SGI	42702	2457721	female			1	0	10	0.390935	1.06644	0.291667	0.27995	0.759864	0.959829	1.99964	0	0	14	38	0	48	0	126.8	63.8	355	33.15	885
TVK05	Phaethon rubricauda	Adult	SGI	42702	2457721	male			1	0	3	0.576343	0.94777	1.37485	13.6995	13.2411	9.96432	36.9049	1.95158	0	37	36	0	27	5.5	130	66.1	335	34.75	765
TVK06	Phaethon rubricauda	Adult	SGI	42702	2457721	male			1	0	1	0.635075	0.864777	1.37826	9.6015	16.0064	6.96641	32.5743	1.50292	0	30.5	48	0	21.5	4.5	127.45	66.2	336	36.4	710
TVK07	Phaethon rubricauda	Adult	SGI	42702	2457721	female			0	1	10	0.564482	0.972216	5.88875	24.2186	7.05163	4.11268	35.3829	1.78162	0	68.5	20	0	11.5	5	131.1	68	352	33.6	805
TVK08	Phaethon rubricauda	Adult	SGI	42702	2457721	female			0	0	0	0.427798	0.917226	3.10763	23.397	17.7219	7.5289	48.6478	4.12355	0	48	36.5	0	15.5	8.5	126.7	64.7	349	32.9	750
TVK09	Phaethon rubricauda	Adult	SGI	42702	2457721	female			0	1	4		0.915378	5.21287	15.6387	4.35676	3.00002	23.0771	0.610742	0.0815705	68.5	18	0.5	13	2.5	125.8	59.6	346	31.6	735
TVK10	Phaethon rubricauda	Adult	SGI	42702	2457721	male			1	0	0	0.65293	0.94409	1.55004	22.4467	21.3011	14.4814	58.2293	3.4558	0	38.5	36.5	0	25	6	128.8	65.45	330	32.75	740
ISG 2	Phaethon rubricauda	Adult	SGI	42898	2457917	female			1	0	26	0.479632	1.07084	0.333333	1.95746	7.82983	5.87237	16.3121	0	0.652486	12	48	4	36	0	125.75	61	335	34.2	860
ISG 3	Phaethon rubricauda	Adult	SGI	42898	2457917	female			1	0	22	0.852635	0.844745	0.981531	8.28502	23.8281	8.44091	42.2046	3.72046	1.65054	21	55.5	3.5	20	9.5	124.7	60	340	36.5	700
ISG 5	Phaethon rubricauda	Adult	SGI	42898	2457917	male			0	0	0	1.14076	1.10428													132.75	64.7	340	40.8	950
ISG 6	Phaethon rubricauda	Adult	SGI	42898	2457917	male			0	0	5	0.933033	0.972775	1.16388	3.73792	4.73475	3.21161	11.6843	0.409473	0	32	40.5	0	27.5	3.5	136.6	39.1	350	36.1	820
ISG 7	Phaethon rubricauda	Adult	SGI	42898	2457917	female			0	0	4		0.972497	1.43478	4.65602	6.06693	3.2451	14.1091	0.98764	0.141091	26.5	44.5	1	28	6.5	129.65	59.45	335	38.25	810
ISG 9	Phaethon rubricauda	Adult	SGI	42898	2457917	male			1	0	10	0.441351	1.00748	1.82586	14.8083	18.8829	8.11027	41.8014	3.93988	0	35.5	44.5	0	20	9.5	130	63.5	350	37.55	860
ISG 10	Phaethon rubricauda	Adult	SGI	42898	2457917	male			1	0	9	0.466516	1.11365	0.958118	2.30157	5.90835	2.40218	10.7486	0.576674	0.136482	20.5	51.5	2	26	5	135.2	67.6	360	36.35	960
EI04	Phaethon rubricauda	Adult	RN	42905	2457924	female	Tatane	Exposed	1	0	0	0.646176	0.885213	1.09554	3.63453	7.96318	3.31756	15.062	1.29403	0.146688	24	53	1	22	8.5	138.05	67.35	335	40.2	750
EI05	Phaethon rubricauda	Adult	RN	42905	2457924	female	Tavita	Exposed	1	0	0	0.378929	1.0888	0.883417	3.56856	8.32789	4.03949	16.5827	0.958421	0.646758	22	49.5	3.5	25	6.5	135.55	66.55	335	31.15	850
EI07	Phaethon rubricauda	Adult	RN	42905	2457924	female	SAG	Exposed	1	0	0	0.334482	0.93596													136	66.35	350	36.25	790
EI02	Phaethon rubricauda	Adult	RN	42905	2457924	male	Arriba Kontiki	Exposed	1	0	0	0.301452	1.08425	0.169811	1.72242	6.88967	10.1431	19.138	1.33966	0.382759	9	36	2	53	7	136.05	64.55	356	35.45	920
EI03	Phaethon rubricauda	Adult	RN	42905	2457924	male	Ladera Kontiki	Exposed	1	0	0	0.34151	1.03995	0.857143	5.19106	17.5919	6.05624	28.8392	1.73035	0	18	61	0	21	6	132.8	65.05	330	36	840
EI06	Phaethon rubricauda	Adult	RN	42905	2457924	male	Angelo	Protected	1	0	0	0.628507	1.00679	0.147899	0.476468	7.24953	3.22159	11.0495	0.705281	0.101872	4	66	1	29	6.5	132.05	70.9	329	37.15	820
EI08	Phaethon rubricauda	Adult	RN	42905	2457924	male	Punaka	Exposed	0	1	0		0.94246	0.606797	2.17404	8.46411	3.58282	14.221	0.697726	0	16	57.5	0	26.5	5.5	123.8	63.3	332	35.35	760
EI09	Phaethon rubricauda	Adult	RN	42906	2457925	female	Vitrina	Protected	1	0	0	0.429283	1.01243	0.511749	0.999911	1.68984	1.95391	4.71123	0.430212	0.0675675	20.5	36	1.5	42	9	130.05	64.2	335	31.1	790
EI10	Phaethon rubricauda	Adult	RN	42906	2457925	female	Tiare Toto	Protected	1	0	0	0.192109	1.04042	1.8478	8.85669	5.92935	4.79309	19.6587	0.865889	0.0795418	42	33.5	0.5	24	4.5	126	61.6	330	35.95	840
EI12	Phaethon rubricauda	Adult	RN	42906	2457925	female	Haka Pupa	Exposed	1	0	0	0.598739	0.889125	1.44505	6.24734	4.07739	4.32326	14.9621	1.0246	0.314116	42.5	27.5	2	28	6.5	137.8	69.75	345	37.35	750
EI14	Phaethon rubricauda	Adult	RN	42906	2457925	female	Nido Cerco	Protected	0	0	0		0.921677	1.08106	5.63309	6.22616	5.21072	17.07	0.943228	0	33	36.5	0	30.5	5.5	132.7	67.15	345	36.25	770
EI11	Phaethon rubricauda	Adult	RN	42906	2457925	male	Al lado Tiare Toto	Exposed	1	0	0	0.262429	0.968212	2.49481	16.9191	10.5221	6.78173	34.223	0.492074	0	49.5	30	0	20.5	1.5	129.7	66.75	345	33.6	790
EI13	Phaethon rubricauda	Adult	RN	42906	2457925	male	Nido Cerco	Protected	0	0	0		0.960204	1.73431	6.26873	3.79169	3.61454	13.675	1.49805	0	45.5	28	0	26.5	10	132	66.25	350	37.6	820
EI15	Phaethon rubricauda	Adult	RN	42909	2457928	female	Nico Coleman	Protected	1	0	0	0.907519	1.09813	0.39046	4.68793	20.8182	12.0062	37.5123	1.87636	0	12.5	55.5	0	32	5	138.4	69.15	335	35.2	890
EI16	Phaethon rubricauda	Adult	RN	42909	2457928	female	Chocho	Exposed	0	0	0	0.97942	0.952617	2.77316	1.96192	1.65738	0.707469	4.32677	0.148629	0	44.5	38.5	0	17	3.5	128	62.95	330	34.65	760
EI17	Phaethon rubricauda	Adult	RN	42909	2457928	male	Chocho	Exposed	0	0	0	0.441351	0.969915	1.74134	5.4249	4.4732	3.11537	13.0135	1.30528	0	42	35	0	23	10.5	130.45	68.1	335	37.15	800
EI18	Phaethon rubricauda	Adult	RN	42911	2457930	female	Farkas	Protected	1	0	0	0.444421	1.06981	0.593441	2.66701	3.33974	4.49415	10.5009	0.756006	0	26.5	29.5	0	44	7.5	133.2	68	348	35.07	890
